# Supplementary material for: Structure and analysis of nanobody binding to the human ASIC1a ion channel
Source: eLife. 2021 Jul 28;10:e67115. doi: 10.7554/eLife.67115 (PMC8318589; doi:10.7554/eLife.67115)
Supplement: Source data 1. — In blue are indicated the clones with highest values. [file elife-67115-data1.xlsx]

## Sheet: Sheet1
ELISA	Nanobodies isolated from 3rd panning
Plate 1	Nb	Control	Nb	Control	Nb	Control	Nb	Control	Nb	Control	Nb	Control
	0.927022	0.337875	1.49109	0.318413	1.64565	0.343676	1.39484	0.36166	1.40811	0.660956	1.65415	0.386367
	1.75315	0.388381	1.53628	0.286228	1.58445	0.444414	1.4783	0.472755	2.00752	0.4705	1.37485	0.446749
	2.12764	0.30764	1.47547	0.2957	1.60053	0.504435	1.4947	0.556191	1.93829	1.01399	1.44811	0.382377
	1.57582	0.336764	1.75298	0.381733	1.64673	0.332603	1.37111	0.47254	1.9537	0.615835	1.81765	0.415334
	1.47411	0.460116	1.45678	0.442158	1.3748	0.485022	1.57846	0.439868	1.67356	0.33009	1.5368	0.351235
	1.31653	0.38196	1.63137	0.440154	1.46885	0.326891	1.26114	0.393049	2.09914	0.371786	1.73362	0.308479
	1.71272	0.457001	1.70252	0.427306	1.54928	0.508105	1.536	0.394288	1.58597	0.452951	2.1147	0.41682
	1.75126	1.34698	1.4184	0.778936	1.43364	0.65675	1.8312	0.410228	1.68336	0.428524	1.62118	0.42172
Plate 2	1.48955	0.224198	1.56843	0.31368	1.76164	0.296408	1.33192	0.462388	1.82187	0.198418	1.65879	0.185977
	1.59299	0.324581	1.34895	0.17264	1.34848	0.352781	1.72281	0.18382	1.28791	0.343752	1.18745	0.216548
	1.4932	0.176919	1.36785	0.34694	1.35479	0.337376	1.82795	0.174026	1.32602	0.356201	1.39606	0.467673
	1.81477	0.404593	1.6391	0.201408	1.50771	0.311375	1.54068	0.189238	1.66671	0.204689	1.53015	0.246096
	1.37869	0.509798	1.9359	0.205859	1.6791	0.125514	1.89314	0.513107	1.38	0.327481	1.6326	0.264897
	1.42973	0.288723	0.98716	0.173667	1.60129	0.31981	1.84471	0.304995	1.63281	0.148151	1.67587	0.170592
	1.59647	0.325377	1.511	0.352672	1.76063	0.287241	1.31552	0.257257	1.41004	0.435288	1.66165	0.198854
	1.47252	0.316317	1.42585	0.727557	1.70613	0.318344	1.66747	0.244282	1.70733	0.38329	1.82713	0.969005
Plate 3	1.86369	0.298667	1.28804	0.526448	1.31324	0.19851	1.60216	0.175239	1.33845	0.203326	1.73474	0.229231
	2.02339	0.337903	1.23594	0.411599	1.25803	0.255782	1.5412	0.156862	1.16086	0.239444	1.81595	0.215015
	1.51192	0.197231	1.52254	0.214149	1.41107	0.173647	1.69711	0.129455	1.14563	0.206331	1.36893	0.369188
	1.94761	0.932416	1.36599	0.165567	1.33441	0.126498	1.60515	0.177197	1.56648	0.305654	1.95497	0.348409
	1.5057	0.490664	1.65152	0.316439	1.71857	1.18157	1.4476	0.195697	1.76157	0.170096	1.28181	0.35682
	1.61982	0.500413	0.731165	0.178286	1.29911	0.241096	1.57501	0.275444	1.77645	0.198909	1.36025	0.20828
	1.34316	0.213133	1.78276	0.275333	1.18586	0.231852	1.51651	0.281297	1.71318	0.216198	2.02563	0.257012
	1.41106	0.711646	1.66691	0.506508	1.37009	0.328579	1.60225	0.592557	1.91608	1.40315	1.37021	0.475281
Plate 4	1.78472	0.81539	1.41738	0.233763	1.40143	0.160168	1.04433	0.326829	1.62237	0.223373	1.33901	0.19927
	1.42475	0.165629	1.27285	0.146439	1.32949	0.164987	1.52233	0.135632	1.61397	0.196164	1.49598	1.08086
	1.03689	0.119533	1.28712	0.180379	1.37638	0.117817	1.48683	0.0931199	1.51158	0.16151	1.54092	0.219662
	1.62268	0.693383	1.07391	0.0922199	1.49551	0.117139	1.27444	0.529185	1.65833	0.573016	1.41651	0.247112
	1.25159	0.110851	1.28691	0.211474	1.3434	0.31123	1.86185	0.117445	1.2394	0.172075	1.29376	0.414788
	1.40091	0.260416	1.08568	0.277599	1.15055	0.188572	1.46035	0.158127	1.50354	0.201592	1.11044	0.281353
	1.42104	0.318361	1.17899	0.229233	1.28018	0.181068	1.21341	0.483125	1.62126	0.673163	1.22747	0.479965
	1.73468	1.31673	1.1727	0.343165	1.55994	0.385497	1.89196	0.313294	1.46895	0.0461324	1.37359	0.61806
