# Supplementary material for: Structure and analysis of nanobody binding to the human ASIC1a ion channel
Source: eLife. 2021 Jul 28;10:e67115. doi: 10.7554/eLife.67115 (PMC8318589; doi:10.7554/eLife.67115)
Supplement: Source data 2. — Peak currents (µA/oocyte) elicited with solutions with the indicated pH measured with two-electrode voltage clamp. pHa = pH of activation, pHssd=pH of steady-state desensitization. [file elife-67115-data2.xlsx]

## Sheet: Sheet1
hASIC1a + Nb-control
pHa	µA/cell	µA/cell	µA/cell	µA/cell	µA/cell	µA/cell	µA/cell	µA/cell	µA/cell	µA/cell			Mean	SD
7.4	0	0	0	0	0	0	0	0	0	0			0	0
6.9	3.12	2.1	0.36	4.2	0.45	2.56	4.8	6.66	6.82	2.61			3.368	2.25969
6.7	6.513	10.045	9.216	17.85	6.975	8	22.944	19.98	19.096	11.02			13.1639	6.13163
6.4	29.601	32.305	30.996	41.328	30.87	19.584	46.944	33.485	30.628	24.94			32.0681	7.6486
6	38.064	33.705	33.696	41.874	41.742	31.232	47.52	36.075	31	28.71			36.3618	5.91227
5	39	35	36	42	45	32	48	37	31	29			37.4	6.16802
hASIC1a + Nb.C1
pHa	µA/cell	µA/cell	µA/cell	µA/cell	µA/cell	µA/cell	µA/cell	µA/cell	µA/cell	µA/cell	µA/cell	µA/cell	Mean	SD
7.4	0	0	0	0	0	0	0	0	0	0	0	0	0	0
6.9	2	3.24	0.598	0.33	2.4	0.57	0.96	0.29	0.74	4.6	9.6	0.35	2.13983	2.71525
6.7	9.6	7.2	8.74	6.27	4.6	11.4	18.24	2.61	9.25	4.6	13.92	5.6	8.5025	4.41762
6.4	36	24.84	33.58	28.05	15.6	34.504	40.8	15.66	31.487	28.98	38.88	17.15	28.7942	8.83664
6	38	33.84	44.62	32.34	18	37.24	46.56	27.55	34.04	41.4	44.64	33.95	36.015	8.07167
5	40	36	46	33	20	38	48	29	37	46	48	35	38	8.39913
hASIC1a
pHssd	µA/cell	µA/cell	µA/cell	µA/cell	µA/cell	µA/cell	µA/cell	µA/cell	µA/cell	µA/cell	µA/cell		µA/cell	µA/cell	µA/cell	µA/cell	µA/cell	µA/cell	µA/cell	µA/cell	µA/cell	µA/cell	Mean	SD
7.4	40	44.45	34.2	32.88	34	41.3	43	30	38	26	29		15	20	18	23	16	12	25	17	11	14	26.849	10.8833
7.2	35.2	38	28.2	28	30	36	36	28	32	22	27		13	17	15	20	13	10	21	14	9.57	13	23.1414	9.43087
7.1	15.3	17.4	16.6	13.6	14	17	18	13	16.4	11	12		6.1	11	6	7.8	8	4	9	6	6	5	11.1048	4.65161
7	2.22	3	2.42	2.5	5	3	3.5	2	3	2	3.2		1	1.4	1.26	1.6	1.1	0.84	1.75	1.19	0.77	1	2.08333	1.08337
6.9	0	0	0	0	0	0	0	0	0	0	0		0	0	0	0	0	0	0	0	0	0	0	0
hASIC1a-DL
pHssd																							Mean	SD
7.4	20.5	23.6	29.17	30	20	37.2	27.34	21.45	22.4	26.7	27.6		11.5	32.4	20.2	30.2	19.4	25.8	16	28.3	14.7	23.5	24.1886	6.23867
7.2	14.35	16.77	20.1	20	14.3	28.3	25	9.3	9.6	17.7	16.7		9.3	21.6	13	19	13.3	17.3	8	16.2	10	14.2	15.9057	5.32381
7.1	4.34	6.13	7.2	7	4.8	10.6	3.62	2.2	2.35	3.81	4.23		5.3	9.9	4.9	6.9	4	4	5	6	3.5	5.3	5.28952	2.14509
7	0.1	3.73	4	0.7	0.6	1.1	0.1	0.4	0.1	0.3	0.5		1.7	3	0.5	0.1	0.6	1	0.3	0.7	0.05	0.9	0.975238	1.17116
6.9	0	0	0	0	0	0	0	0	0	0	0		0	0	0	0	0	0	0	0	0	0	0	0
cASIC1
pHssd																							Mean	SD
7.7	15.44	16.83	11.2	11.3	11.6	18	14.2	17.3	16.5	15.2	20.4		15.7	10.5	18.6	22	9.1	17.3	14.1	19.3	18.4	11	15.4271	3.5738
7.6
7.5	6.91	7.13	5	5.2	5	14	12	12.5	13	12	15		11	8.6	13	16	8.6	14.8	12	14.9	14.8	8	10.9257	3.64067
7.45	3.35	3.51	2.2	2.25	1.2	8	6	8	7.5	7.2	7.8		7	5	7.8	9	4.5	8.2	6.9	9.2	7.6	4.3	6.02429	2.42397
7.35	1.07	1.16	1.15	0.9	0.49	3	2.8	3.2	3.2	2.5	4		1.5	0.8	1.5	1.8	0.2	0.7	0.5	0.8	0.6	0.8	1.55571	1.10472
7.3	0.53	0.65	0.48	0.6	0.19	1.3	0.6	0.8	0.6	0.7	1		0.6	0.4	0.8	1	0.4	0.8	0.5	0.9	0.5	0.5	0.659524	0.250549
7.2	0	0	0	0	0	0	0	0	0	0	0		0	0	0	0	0	0	0	0	0	0	0	0
cASIC1+DL
pHssd																							Mean	SD
7.6	22.47	45.6	21.52	24.44	25.1	50.8	51.8	52.8	46	40	38.5		21	15	28	12	15.6	23.7	13.5	15.5	18.4	17.1	28.5157	13.9662
7.5
7.45	11.9	43	17.46	17	20	42.35	43.45	42.6	35.9	32	31		16	12.2	22.2	10.3	12.5	19.9	10	12.6	16	12	22.8743	12.2093
7.4	6.7	26.35	12.13	14	13	29.35	25.81	28.6	24	21	18		11	7	13.8	6.3	8.5	14	6	9	8.8	9.1	14.972	8.05018
7.35	3.58	16	7.77	9.7	9	21.7	16.66	19.1	16	14	13		7	5.6	9	5.3	4.9	8.2	4.7	6	5.1	6.1	9.65316	5.44191
7.3	1.5	8	3.54	5.5	5	16.25	10	11.6	8	10	8.6		4	2.7	3.4	2.1	2.9	5.8	3	2.8	3.4	3.7	5.89389	4.00324
7.2	0	0	0	0	0	0	0	0	0	0	0		0	0	0	0	0	0	0	0	0	0	0	0
