# Supplementary material for: Structure and analysis of nanobody binding to the human ASIC1a ion channel
Source: eLife. 2021 Jul 28;10:e67115. doi: 10.7554/eLife.67115 (PMC8318589; doi:10.7554/eLife.67115)
Supplement: Source data 3. — C1-Flexible linker-PcTx or Nb.C1-Rigid linker-PcTx shown if Figure 5L. [file elife-67115-data3.xlsx]

## Sheet: Sheet1
Nb-Flex-PcTx
Initial Current	40	36	43	28	32	41	29
time (min)
0	2.8	2.448	1.29	1.12	2.88	4.1	2.32
1
2
3
4	6	3.24	3.87	2.24	5.76	14.35	4.3761
5
6
7
8	6.8	3.6	9.89	2.52	6.4	14.76	3.77
9
10
11
12	7.2	5.4	14.62	4.48	7.36	15.17	5.22
13
14
15
16	6.4	5.76	12.9	3.92	8	15.99	5.8
17
18
20	6.4	5.04	14.19	3.92	7.68	16.4	5.51
22
23	6.8	3.6	14.19	4.2	7.68	16.4	5.8
25
27	4	4.32	13.33	3.64	7.04	15.99	5.8
Nb-Rigid-PcTx
Initial current (µA/cell)	42	40	39	38	28	40	27	30	44	48	52	33
time (min)
0	2.52	3	1.4				1	1.28	1.6	1	1.2	0.95
2	2.5	3.1	1.4				1.1	1.3	1.62	1.2	1.3	0.98
4	2.65	3.6	1.6	2	2.3			1.7	1.7	1.6	2
6	3.2	3.9	1.2	2.9	1.5	1.48	1.15	2.6	1.7	4.35	2.1	2
8	3.5	4.2	1.8	3	1.7	2.6	2.2	2.64	1.5	4.4	2.6	2.3
10	3.9	4.8	22.4	3	2	2.7	1.6	2.66	1.8			2.4
12		4.9	2.6	3	1.8		2.25		2		4.5	2.8
14		5.3	2.65	3	2.5			2.7	2.1	10
16		5.8	3.3	2.9	2.9	3.1			3		6.3
18		6.1	3.8	2.8			3	2.8	3	12.6	6
20		6.9	4.8	3.3		3.3	3.1		2.5			3
22		6.9	5	3.6	4.2			3	4	8.8	11
24		7.5	5.3	3.9			3.3		4.1			3.2
26		7.8				4		3.1			12
